# Supplementary material for: Prevalence and characterization of ESBL-producing Escherichia coli in healthy pregnant women and hospital environments in Benin: an approach based on Tricycle
Source: PubMed Central journal article supplement (PMC10569593; doi:10.3389/fpubh.2023.1227000), 2023-09-28
Supplement: Data_Sheet_1.pdf [file Data_Sheet_1.pdf]

## Supplementary Material

### Prevalence and Characterization of ESBL-Producing *Escherichia coli* in Healthy Pregnant Women and Hospital Environments in Benin: an approach based on Tricycle

Kevin Sintondji ([maelkevinprince@gmail.com](mailto:maelkevinprince@gmail.com)), Kafayath Fabiyi ([kafayathfabiyi@yahoo.fr](mailto:kafayathfabiyi@yahoo.fr)), Jules Hougbenou ([houbenoubeaugard@gmail.com](mailto:houbenoubeaugard@gmail.com)), Hornel Koudokpon ([charleshornel@yahoo.fr](mailto:charleshornel@yahoo.fr)), Boris Lègba ([boris.legba5@gmail.com](mailto:boris.legba5@gmail.com)), Hornella Amoussou ([amoussouhornella@gmail.com](mailto:amoussouhornella@gmail.com)), Kaisa Haukka ([kaisa.haukka@helsinki.fi](mailto:kaisa.haukka@helsinki.fi)), Victorien Dougnon\* ([victorien.dougnon@gmail.com](mailto:victorien.dougnon@gmail.com))

\*Corresponding Author: Victorien Dougnon, [victorien.dougnon@gmail.com](mailto:victorien.dougnon@gmail.com)

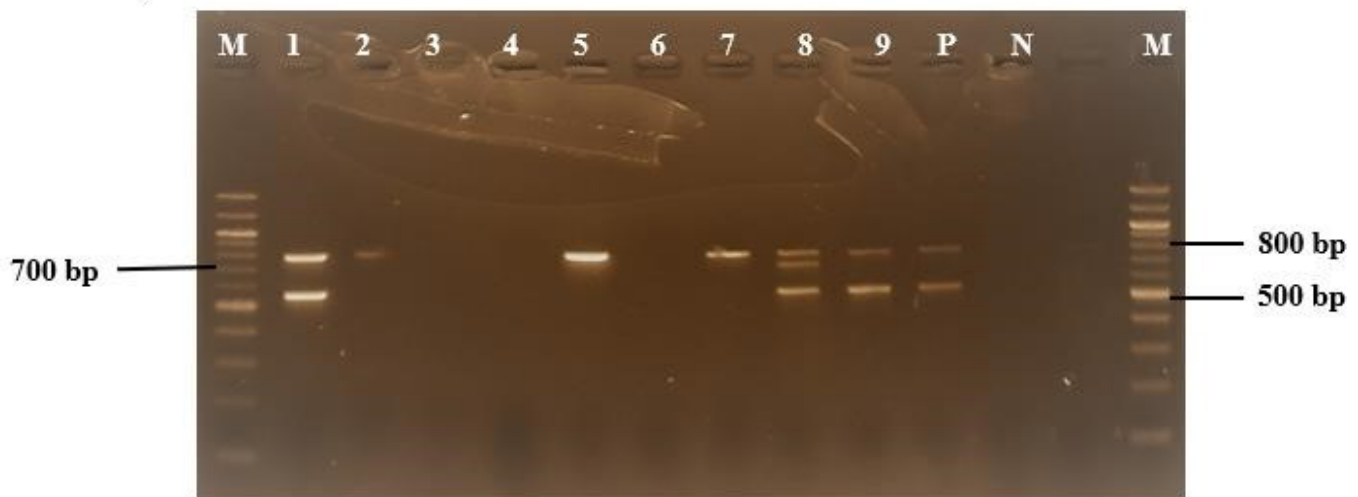

Legend: (M): Gene ruler 100pb; (N): Negative control; (P): Positive control; (8): Positive sample for *bla<sub>SHV</sub>* gene; (1, 2, 5, 7, 8, 9): Positive samples for *bla<sub>TEM</sub>* gene; (1, 8, 9): Positive samples for *bla<sub>OXA-1</sub>* gene.

**Figure 1:** Electrophoresis profile of *bla<sub>TEM</sub>* gene (800bp), *bla<sub>SHV</sub>* gene (713bp), *bla<sub>OXA-1</sub>* gene (564bp).

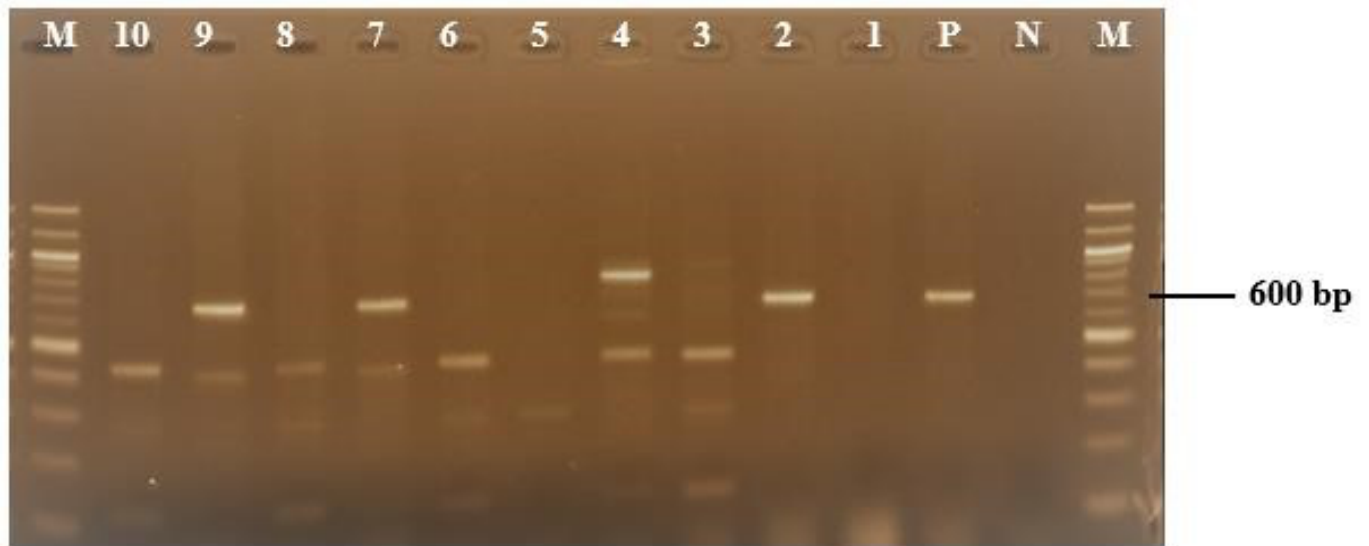

**Figure 2:** Electrophoresis profile of *bla<sub>CTXM-1</sub>* gene (688bp)

Legend: (M)Gene ruler 100pb; (N): Negative control; (P): Positive control; (2, 7, 9): Positive samples; (1, 3, 4, 5, 6, 8): Negative samples

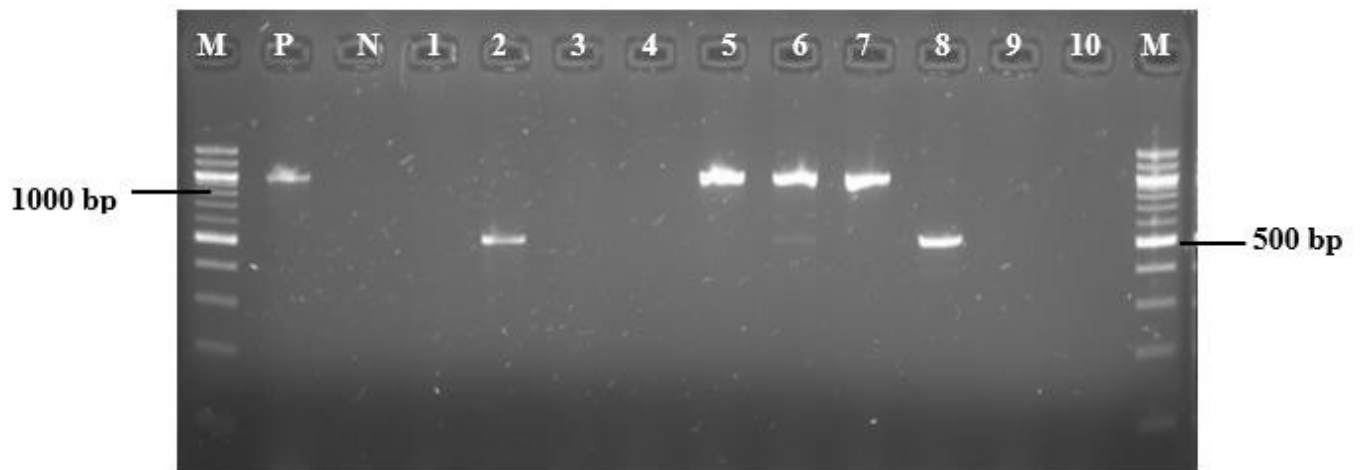

Legend: (M): Gene ruler 100pb; (N): Negative control; (P): Positive control; (5, 6, 7): Positive samples; (2, 8): Positive samples *bla<sub>CTXM-9</sub>* gene

**Figure 3:** Electrophoresis profile of *bla<sub>CTXM-15</sub>* gene (995bp), *bla<sub>CTXM-9</sub>* gene (561bp)
